# Supplementary material for: Enhancing Prediction for Tumor Pathologic Response to Neoadjuvant Immunochemotherapy in Locally Advanced Esophageal Cancer by Dynamic Parameters from Clinical Assessments
Source: MDPI journal article supplement (doi:10.3390/cancers15174377), 2023-09-01

**Table S1.** ICC among the five parameters from esophagogram

|             | ICC   | 95%CI |       | p.value |
|-------------|-------|-------|-------|---------|
| Stenosis    | 0.794 | 0.611 | 0.897 | <0.001  |
| Dilation    | 0.753 | 0.542 | 0.875 | <0.001  |
| Shrinkage   | 0.775 | 0.581 | 0.886 | <0.001  |
| Smoothness  | 0.735 | 0.505 | 0.866 | <0.001  |
| Total Score | 0.833 | 0.68  | 0.916 | <0.001  |

**Table S2.** Multivariate logistic regression associating parameters from clinical assessments with pathological response

|                          | pCR <sup>a</sup> |        |        |         | MPR <sup>a</sup> |        |       |         |
|--------------------------|------------------|--------|--------|---------|------------------|--------|-------|---------|
|                          | OR               | 95% CI |        | p.value | OR               | 95% CI |       | p.value |
| Model1: CT+esophagogram  |                  |        |        |         |                  |        |       |         |
| GTV-post                 | 0.978            | 0.922  | 1.035  | 0.449   | 0.954            | 0.906  | 1.002 | 0.059   |
| post/pre                 | 0.961            | 0.929  | 0.989  | 0.011   | 0.962            | 0.931  | 0.988 | 0.009   |
| GTV-residual             | 0.998            | 0.992  | 1.004  | 0.599   | 1.000            | 0.995  | 1.005 | 0.921   |
| Smoothness               |                  |        |        |         | 2.609            | 1.682  | 4.310 | <0.001  |
| Esophagogram-total       | 1.209            | 1.089  | 1.362  | 0.001   |                  |        |       |         |
| Dose reduction(above15%) | 3.051            | 0.911  | 11.606 | 0.081   |                  |        |       |         |
| Sex(male)                | 0.479            | 0.135  | 1.567  | 0.234   |                  |        |       |         |

**Table S3.** Clinical characteristics of patients in the testing and training cohorts

|                 | testing N=41 | training N=111 | p.overall |
|-----------------|--------------|----------------|-----------|
| NICE:           |              |                | 0.649     |
| Others(q3w)     | 15 (36.6%)   | 47 (42.3%)     |           |
| NICE(qw)        | 26 (63.4%)   | 64 (57.7%)     |           |
| age             | 61.7 (8.00)  | 64.8 (7.11)    | 0.036     |
| sex:            |              |                | 0.803     |
| female          | 6 (14.6%)    | 20 (18.0%)     |           |
| male            | 35 (85.4%)   | 91 (82.0%)     |           |
| GTV-pre         | 53.6 (44.6)  | 36.2 (21.5)    | 0.021     |
| tumor location: |              |                | 0.613     |
| LOWER           | 24 (58.5%)   | 55 (49.5%)     |           |
| MIDDLE          | 11 (26.8%)   | 37 (33.3%)     |           |
| UPPER           | 6 (14.6%)    | 19 (17.1%)     |           |
| clinical-T:     |              |                | 0.002     |
| T1              | 0 (0.00%)    | 3 (2.70%)      |           |
| T2              | 11 (26.8%)   | 60 (54.1%)     |           |
| T3              | 30 (73.2%)   | 48 (43.2%)     |           |
| clinical-N:     |              |                | 0.264     |
| N0              | 2 (4.88%)    | 4 (3.60%)      |           |
| N1              | 14 (34.1%)   | 22 (19.8%)     |           |
| N2              | 20 (48.8%)   | 69 (62.2%)     |           |
| N3              | 5 (12.2%)    | 16 (14.4%)     |           |
| MPR:            |              |                | 0.748     |
| non-MPR         | 17 (41.5%)   | 41 (36.9%)     |           |
| MPR             | 24 (58.5%)   | 70 (63.1%)     |           |
| pCR:            |              |                | 0.898     |
| non-pCR         | 27 (65.9%)   | 70 (63.1%)     |           |
| pCR             | 14 (34.1%)   | 41 (36.9%)     |           |
| TRG:            |              |                | 0.960     |
| TRG1            | 14 (34.1%)   | 41 (36.9%)     |           |
| TRG2            | 10 (24.4%)   | 29 (26.1%)     |           |
| TRG3            | 5 (12.2%)    | 11 (9.91%)     |           |
| TRG4            | 12 (29.3%)   | 30 (27.0%)     |           |
| yp-T:           |              |                | 0.690     |
| T0              | 14 (34.1%)   | 41 (36.9%)     |           |
| T1              | 6 (14.6%)    | 22 (19.8%)     |           |
| T2              | 7 (17.1%)    | 12 (10.8%)     |           |
| T3              | 14 (34.1%)   | 36 (32.4%)     |           |
| yp-N:           |              |                | 0.209     |
| N0              | 27 (65.9%)   | 59 (53.2%)     |           |
| N1              | 11 (26.8%)   | 27 (24.3%)     |           |
| N2              | 2 (4.88%)    | 18 (16.2%)     |           |
| N3              | 1 (2.44%)    | 7 (6.31%)      |           |

**Figure S1.** GTV-pre and GTV-PET-pre agreement analysis by Passing-Bablok regression

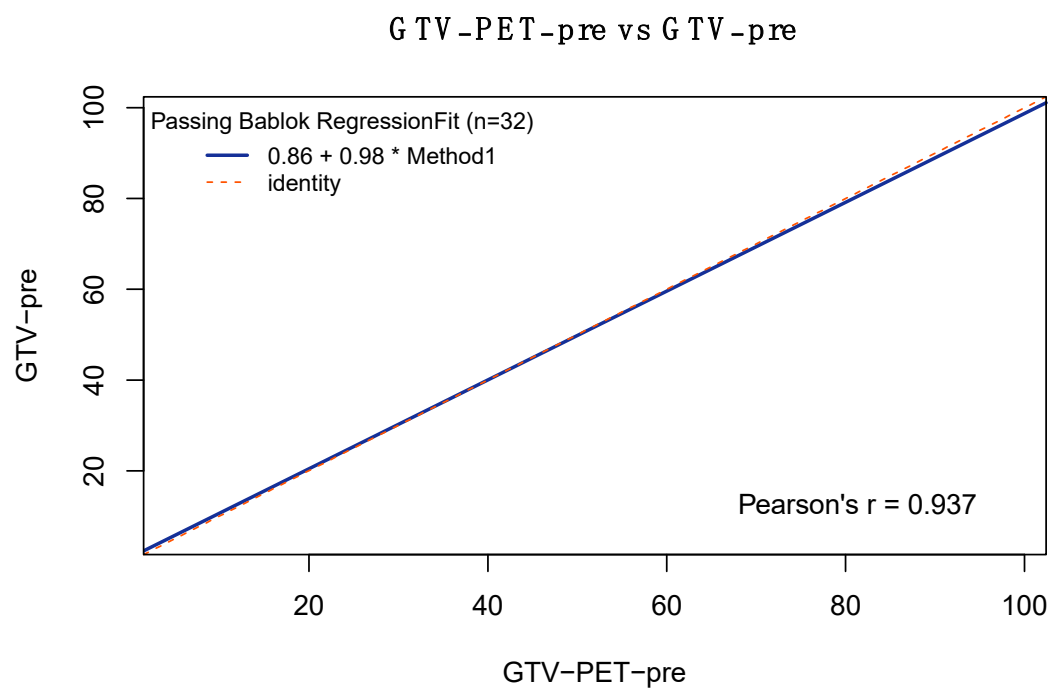

**Figure S2.** (A) The calibration plot of the MPR Model 2 in the testing cohort. (B) The decision curve for the testing cohort of the MPR Model 2 nomogram.

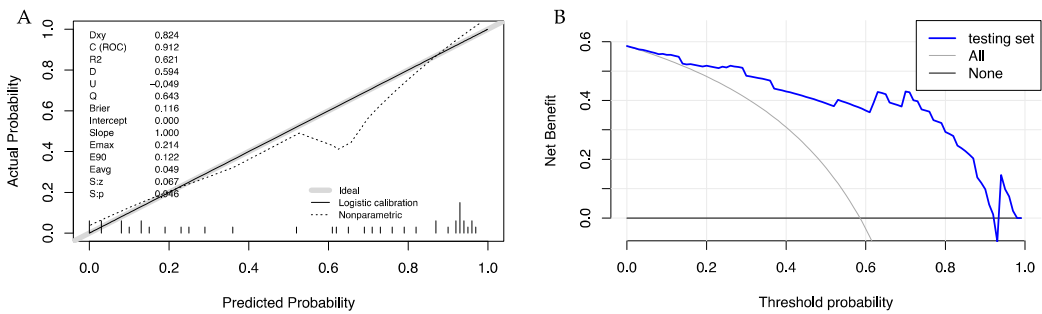

Supplement: s1 [file s1]
